# Supplementary material
Source: Springer Nature journal article supplement (https://www.springermedizin.de/resource/supplementary/12874_2009_388_MOESM1_ESM.pdf/9434370)
Supplement: MOESM1 [file 9434370]

## **Appendix 1: Computer Assisted Telephone Interview – Preamble script and Questions**

### ***Preamble script at start of CATI (on screen)***

Hello, my name is .....and I am ringing from the Monash University medical school (in Victoria) about a recycled water project that we are conducting.

We are performing research into the use of recycled water in homes as a conservation measure and its potential health effects.

In the last month we sent a pamphlet to your address explaining our study and wonder whether you could assist us by answering a 20 minute questionnaire on your household water usage such as washing machine and toilet use and garden watering.

**If Yes and can do interview now ask eligibility questions: Ask recycled water (dual reticulation households) both eligibility questions. Control households only to be asked about their age ie >18 years old.**

Firstly, I have to confirm that you are eligible for the telephone interview:

|                                                                                                        |
|--------------------------------------------------------------------------------------------------------|
| <b><u>Only recycled water (dual reticulation households) to be asked this eligibility question</u></b> |
|--------------------------------------------------------------------------------------------------------|

- Is this household supplied with recycled water

If Yes = eligible

If No = in eligible

If ineligible thank person for their help

|                                                                                                        |
|--------------------------------------------------------------------------------------------------------|
| <b><u>Ask both recycled (dual reticulation ) and control households this eligibility question:</u></b> |
|--------------------------------------------------------------------------------------------------------|

- Are you >18 years old?

If Yes = eligible

If No = ask to speak to householder >18 years old

### **If Yes but can't do interview now:**

Arrange to call back at a convenient time (ascertain name of person to be contacted and time that will suit)

Person to ask for:.....

Most convenient time to call back:.....

### **If No:**

Thank the householder and say goodbye

### **If eligible:**

You are eligible for the telephone interview so now I will begin the interview:

## Computer Assisted Telephone Interview –Questions

| GENERAL QUESTIONS MODULE                                                                                                                                                                                                                                                                                                                                                                  |                                                                                                                                                                                                                                                                                                                                                                                                                                                                                                                                                                                                                                                                                                                                                                               |
|-------------------------------------------------------------------------------------------------------------------------------------------------------------------------------------------------------------------------------------------------------------------------------------------------------------------------------------------------------------------------------------------|-------------------------------------------------------------------------------------------------------------------------------------------------------------------------------------------------------------------------------------------------------------------------------------------------------------------------------------------------------------------------------------------------------------------------------------------------------------------------------------------------------------------------------------------------------------------------------------------------------------------------------------------------------------------------------------------------------------------------------------------------------------------------------|
| <b>1. How many people 18 years or older live in the household?</b>                                                                                                                                                                                                                                                                                                                        | <div style="border: 1px solid black; width: 40px; height: 20px; margin: 0 auto; display: flex; align-items: center; justify-content: center;">#</div>                                                                                                                                                                                                                                                                                                                                                                                                                                                                                                                                                                                                                         |
| <b>2. Are there any children under 18 years old?</b><br><ul style="list-style-type: none"> <li>▪ Yes (Go to a)</li> <li>▪ No (Go to Question 3 this module)</li> </ul>                                                                                                                                                                                                                    | <div style="display: flex; flex-direction: column; align-items: center; justify-content: center;"> <div style="border: 1px solid black; width: 20px; height: 20px; margin-bottom: 5px;"></div> <div style="border: 1px solid black; width: 20px; height: 20px; margin-bottom: 5px;"></div> </div>                                                                                                                                                                                                                                                                                                                                                                                                                                                                             |
| <b>a) How many children in each of the age ranges?</b><br><br><ul style="list-style-type: none"> <li>▪ Under 5 years</li> <li>▪ 5-12 years</li> <li>▪ 13-17years</li> </ul>                                                                                                                                                                                                               | <div style="display: flex; flex-direction: column; align-items: center; justify-content: center;"> <div style="border: 1px solid black; width: 40px; height: 20px; margin-bottom: 5px; display: flex; align-items: center; justify-content: center;">#</div> <div style="border: 1px solid black; width: 40px; height: 20px; margin-bottom: 5px; display: flex; align-items: center; justify-content: center;">#</div> <div style="border: 1px solid black; width: 40px; height: 20px; margin-bottom: 5px; display: flex; align-items: center; justify-content: center;">#</div> </div>                                                                                                                                                                                       |
| <b>3. How many persons are usually at home <u>during the day on weekdays</u>?</b>                                                                                                                                                                                                                                                                                                         | <div style="border: 1px solid black; width: 40px; height: 20px; margin: 0 auto; display: flex; align-items: center; justify-content: center;">#</div>                                                                                                                                                                                                                                                                                                                                                                                                                                                                                                                                                                                                                         |
| <b>4. Are you the property owner or tenant?</b><br><br><ul style="list-style-type: none"> <li>▪ Property owner</li> <li>▪ Tenant</li> </ul>                                                                                                                                                                                                                                               | <div style="display: flex; flex-direction: column; align-items: center; justify-content: center;"> <div style="border: 1px solid black; width: 20px; height: 20px; margin-bottom: 5px;"></div> <div style="border: 1px solid black; width: 20px; height: 20px; margin-bottom: 5px;"></div> </div>                                                                                                                                                                                                                                                                                                                                                                                                                                                                             |
| <b>5. What type of house do you live in? Is it a separate house or a unit or terrace style house ? (Interviewer to tick relevant box as below)</b><br><br><ul style="list-style-type: none"> <li>▪ Separate house</li> <li>▪ Semi detached house</li> <li>▪ A town house or unit</li> <li>▪ Row / terrace style house</li> <li>▪ Flat or apartment</li> </ul> <p>Other (specify).....</p> | <div style="display: flex; flex-direction: column; align-items: center; justify-content: center;"> <div style="border: 1px solid black; width: 20px; height: 20px; margin-bottom: 5px;"></div> <div style="border: 1px solid black; width: 20px; height: 20px; margin-bottom: 5px;"></div> <div style="border: 1px solid black; width: 20px; height: 20px; margin-bottom: 5px;"></div> <div style="border: 1px solid black; width: 20px; height: 20px; margin-bottom: 5px;"></div> <div style="border: 1px solid black; width: 20px; height: 20px; margin-bottom: 5px;"></div> <div style="border: 1px solid black; width: 20px; height: 20px; margin-bottom: 5px;"></div> <div style="border: 1px solid black; width: 20px; height: 20px; margin-bottom: 5px;"></div> </div> |
| <b>6. How many drinking water taps are there outside the home? (If control household, Go to GARDEN MODULE after answering this question)</b>                                                                                                                                                                                                                                              | <div style="border: 1px solid black; width: 40px; height: 20px; margin: 0 auto; display: flex; align-items: center; justify-content: center;">#</div>                                                                                                                                                                                                                                                                                                                                                                                                                                                                                                                                                                                                                         |
| <p style="text-align: center;"><b><u>RECYCLED WATER HOUSEHOLDS ONLY:</u></b></p> <b>7. How many <u>recycled</u> water taps are there outside the home?</b><br><br><b>Go to GARDEN MODULE</b>                                                                                                                                                                                              | <div style="border: 1px solid black; width: 40px; height: 20px; margin: 0 auto; display: flex; align-items: center; justify-content: center;">#</div>                                                                                                                                                                                                                                                                                                                                                                                                                                                                                                                                                                                                                         |

| <b>GARDEN MODULE</b>                                                                                                                                                                                                                                                                                                       |                                                                                                              |
|----------------------------------------------------------------------------------------------------------------------------------------------------------------------------------------------------------------------------------------------------------------------------------------------------------------------------|--------------------------------------------------------------------------------------------------------------|
| <p><b>a) What is the garden size?</b></p> <ul style="list-style-type: none"> <li>• No garden (<b>Go to TOILET MODULE</b>)</li> <li>▪ Occupies &lt;10% of the land area of the property</li> <li>▪ Occupies 10-25% of the land area of the property</li> <li>▪ Occupies &gt;25% of the land area of the property</li> </ul> | <input type="checkbox"/><br><input type="checkbox"/><br><input type="checkbox"/><br><input type="checkbox"/> |
| <p><b>b) Describe the type of garden</b></p> <ul style="list-style-type: none"> <li>▪ Courtyard style with paving or decking</li> <li>▪ Lawn only</li> <li>▪ Lawn and plants</li> <li>▪ Plants or vegetable garden only</li> </ul>                                                                                         | <input type="checkbox"/><br><input type="checkbox"/><br><input type="checkbox"/><br><input type="checkbox"/> |
| <p><b>c) How many years has your garden been established?</b></p> <ul style="list-style-type: none"> <li>• Enter number of years</li> <li>• Don't know</li> </ul>                                                                                                                                                          | <input style="width: 50px; height: 20px;" type="text" value="#"/><br><input type="checkbox"/>                |
| <p><b>d) Do you or anyone in the household water the garden at any time?</b></p> <ul style="list-style-type: none"> <li>▪ Yes (<b>Go to e if dual reticulation household otherwise if in control group go to f</b>)</li> <li>▪ No (<b>Go to TOILET MODULE</b>)</li> </ul>                                                  | <input type="checkbox"/><br><input type="checkbox"/>                                                         |
| <p><b>ONLY ASK DUAL RETICULATION HOUSEHOLDS THIS QUESTION</b></p> <p><b>e) What type of water do you use to water the garden?</b></p> <ul style="list-style-type: none"> <li>• Recycled water only</li> <li>• Drinking water only</li> <li>• A mixture of recycled water and drinking water</li> </ul>                     | <input type="checkbox"/><br><input type="checkbox"/><br><input type="checkbox"/>                             |
| <p><b>f) Are you able to answer questions / make estimations about garden watering</b></p> <ul style="list-style-type: none"> <li>▪ No (<b>Go to TOILET MODULE</b>)</li> <li>▪ Yes (<b>Go to g</b>)</li> </ul>                                                                                                             | <input type="checkbox"/><br><input type="checkbox"/>                                                         |

|                                                                                                                                                                                                                                                                                                                                                                                                                     |                                                                                                                                                                                                                                                                                      |
|---------------------------------------------------------------------------------------------------------------------------------------------------------------------------------------------------------------------------------------------------------------------------------------------------------------------------------------------------------------------------------------------------------------------|--------------------------------------------------------------------------------------------------------------------------------------------------------------------------------------------------------------------------------------------------------------------------------------|
| <p><b>g) Think back over the last 7 days: did you or anyone else in the household water the garden or lawn?</b></p> <ul style="list-style-type: none"> <li>• Yes (<b>Go to h</b>)</li> <li>• No (<b>Go to GARDEN QUESTION 2</b>)</li> </ul>                                                                                                                                                                         | <div style="text-align: center;"> <input type="checkbox"/><br/> <input type="checkbox"/> </div>                                                                                                                                                                                      |
| <p><b>h) How many times did you or someone else water the garden in the last 7 days?</b><br/>(If answered 'once' then Go to i, If not Go to j)</p>                                                                                                                                                                                                                                                                  | <div style="text-align: center;"> <input type="text" value="#"/> </div>                                                                                                                                                                                                              |
| <p><b>i) If you or someone else only watered the garden once in the last 7 days how long ago before that was it last watered?</b></p> <ul style="list-style-type: none"> <li>▪ Between 1-2 weeks ago</li> <li>▪ More than 2 weeks but less than 4 weeks ago</li> <li>▪ More than a month ago</li> </ul>                                                                                                             | <div style="text-align: center;"> <input type="checkbox"/><br/> <input type="checkbox"/><br/> <input type="checkbox"/> </div>                                                                                                                                                        |
| <p><b>j) In which of the following ways did you or someone else in the household, water the garden or lawn in the last 7 days?</b></p> <ul style="list-style-type: none"> <li>▪ Fixed automatic watering system</li> <li>▪ Fixed watering system operated manually</li> <li>▪ Hand held hose</li> <li>▪ Hose and sprinkler</li> <li>▪ Watering can or bucket</li> <li>▪ Other</li> </ul> <p><b>Specify</b>.....</p> | <div style="text-align: center;"> Y/N<br/><br/> <input type="checkbox"/><br/><br/> <input type="checkbox"/><br/><br/> <input type="checkbox"/><br/><br/> <input type="checkbox"/><br/><br/> <input type="checkbox"/><br/><br/> <input type="checkbox"/> </div>                       |
| <p><b>k) For how many minutes (or how many watering cans or buckets) would each watering session have lasted for each method?</b></p> <ul style="list-style-type: none"> <li>• Fixed automatic watering system</li> <li>• Fixed watering system operated manually</li> <li>• Hand held hose</li> <li>• Hose and sprinkler</li> <li>• Watering can or bucket</li> <li>• Other</li> </ul>                             | <div style="text-align: center;"> <input type="text" value="#"/><br/><br/> <input type="text" value="#"/> </div> |

|                                                                                                                                                                                                                                                                                                                                                                                                             |                                                                                                                                                                                                          |
|-------------------------------------------------------------------------------------------------------------------------------------------------------------------------------------------------------------------------------------------------------------------------------------------------------------------------------------------------------------------------------------------------------------|----------------------------------------------------------------------------------------------------------------------------------------------------------------------------------------------------------|
| <p>1) <b>To the best of your knowledge, what was the maximum number of people in the garden when the garden was being watered (excluding the person watering the garden)? (Enter number)</b></p> <p style="text-align: center;"><b>GO TO TOILET MODULE</b></p>                                                                                                                                              | <input type="text" value="#"/>                                                                                                                                                                           |
| <p><b>1. If you did not water the garden or lawn in the last 7 days think about the occasion before that when you watered the garden or lawn</b></p> <p><b>a) When was this?</b></p> <ul style="list-style-type: none"> <li>▪ Between 1-2 weeks ago</li> <li>▪ More than 2 weeks but less than 4 weeks ago</li> <li>▪ More than a month ago</li> </ul>                                                      | <input type="checkbox"/><br><input type="checkbox"/><br><input type="checkbox"/>                                                                                                                         |
| <p><b>b) In which of the following ways did you or someone else in the household, water the garden or lawn on this occasion:</b></p> <ul style="list-style-type: none"> <li>• Fixed automatic watering system</li> <li>• Fixed watering system operated manually</li> <li>• Hand held hose</li> <li>• Hose and sprinkler</li> <li>• Watering can or bucket</li> <li>• Other?</li> </ul> <p>Specify.....</p> | <p>Y/N</p> <input type="checkbox"/><br><input type="checkbox"/><br><input type="checkbox"/><br><input type="checkbox"/><br><input type="checkbox"/><br><input type="checkbox"/>                          |
| <p><b>c) For how many minutes (or number watering cans/buckets) would each watering session have lasted for each method?</b></p> <ul style="list-style-type: none"> <li>• Fixed automatic watering system</li> <li>• Fixed watering system operated manually</li> <li>• Hand held hose</li> <li>• Hose and sprinkler</li> <li>• Watering can or bucket</li> <li>• Other</li> </ul>                          | <input type="text" value="#"/><br><input type="text" value="#"/><br><input type="text" value="#"/><br><input type="text" value="#"/><br><input type="text" value="#"/><br><input type="text" value="#"/> |

**d) To the best of your knowledge, what is the maximum number of people were in the garden when the garden was being watered (excluding the person watering the garden)?**

#

**GO TO TOILET MODULE**

| <b>TOILET MODULE</b>                                                                                                                                                                                                                                                                                                                                                       |                                                                                                                                                                                                                                                                                                                                                                                                                      |
|----------------------------------------------------------------------------------------------------------------------------------------------------------------------------------------------------------------------------------------------------------------------------------------------------------------------------------------------------------------------------|----------------------------------------------------------------------------------------------------------------------------------------------------------------------------------------------------------------------------------------------------------------------------------------------------------------------------------------------------------------------------------------------------------------------|
| <p><i>About your toilets</i></p> <p><b>1. How many toilets in your household?</b></p>                                                                                                                                                                                                                                                                                      | <div style="border: 1px solid black; width: 40px; height: 30px; margin: 0 auto; display: flex; align-items: center; justify-content: center;">#</div>                                                                                                                                                                                                                                                                |
| <p><b>2. How many of these are dual flush?</b></p>                                                                                                                                                                                                                                                                                                                         | <div style="border: 1px solid black; width: 40px; height: 30px; margin: 0 auto; display: flex; align-items: center; justify-content: center;">#</div>                                                                                                                                                                                                                                                                |
| <p><b>3. What percentage of the time do you use half flush as opposed to full flush?</b></p> <ul style="list-style-type: none"> <li>• Less than 25% of the time</li> <li>• 25-50% of the time</li> <li>• 51-75% of the time</li> <li>• More than 75% of the time?</li> </ul>                                                                                               | <div style="display: flex; flex-direction: column; align-items: center; justify-content: center; gap: 10px;"> <div style="border: 1px solid black; width: 20px; height: 20px;"></div> <div style="border: 1px solid black; width: 20px; height: 20px;"></div> <div style="border: 1px solid black; width: 20px; height: 20px;"></div> <div style="border: 1px solid black; width: 20px; height: 20px;"></div> </div> |
| <p><b>4. On a normal weekday how many times would you estimate that <u>you personally</u> flush the toilet? Would that be the same for weekends or is it more or less frequently? What is your estimate for the weekend days?</b></p> <p>a) on the week days</p> <p>b) on each day of the weekend</p> <p style="text-align: center;"><b>GO TO SWIMMING POOL MODULE</b></p> | <div style="border: 1px solid black; width: 40px; height: 30px; margin: 0 auto; display: flex; align-items: center; justify-content: center;">#</div> <div style="border: 1px solid black; width: 40px; height: 30px; margin: 10px auto; display: flex; align-items: center; justify-content: center;">#</div>                                                                                                       |

| <b>SWIMMING POOL MODULE</b>                                                                                                                                                                                                                                                                                                                                                                             |                                                                                       |
|---------------------------------------------------------------------------------------------------------------------------------------------------------------------------------------------------------------------------------------------------------------------------------------------------------------------------------------------------------------------------------------------------------|---------------------------------------------------------------------------------------|
| <p><b>1. Do you have a swimming pool, outdoor spa or a wading / toddler pool?</b></p> <ul style="list-style-type: none"> <li>• <b>Yes (If control household go to 2 but if you are a dual reticulation household go to 1a)</b></li> <li>• <b>No (Go to PET MODULE)</b></li> </ul>                                                                                                                       | 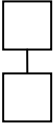   |
| <p><b>ONLY DUAL RETICULATION HOUSEHOLDS ARE ASKED THIS QUESTION</b></p> <p><b>a) What water do you use to fill the pool?</b></p> <ul style="list-style-type: none"> <li>▪ Recycled water only</li> <li>▪ Drinking water only</li> <li>▪ A mixture of recycled water and drinking water</li> </ul>                                                                                                       |    |
| <p><b>ALL HOUSEHOLDS ARE ASKED THIS SERIES OF QS</b></p> <p><b>b) What is the size of the pool or spa?</b></p> <ul style="list-style-type: none"> <li>▪ Large sized swimming pool (&gt;9m x 4m wide)</li> <li>▪ Medium sized swimming pool(4-9m x 2-4m wide)</li> <li>▪ Small sized swimming pool (1-4m x 1-2m wide)</li> <li>▪ Toddler / wading pool</li> <li>• Outdoor spa</li> <li>• Pond</li> </ul> |  |
| <p><b>c) Do you top up the pool at particular times of the year? If so, for how much of the year would you top it up?</b></p> <ul style="list-style-type: none"> <li>▪ ¼ of the year</li> <li>▪ 1/3 of the year</li> <li>▪ ½ of the year</li> <li>▪ ¾ of the year</li> <li>▪ all year</li> </ul>                                                                                                        |  |



|                                                                                                                                                                                                                                                                                                        |                                                                                          |
|--------------------------------------------------------------------------------------------------------------------------------------------------------------------------------------------------------------------------------------------------------------------------------------------------------|------------------------------------------------------------------------------------------|
| <p><b>d) Who in the household is usually responsible for topping up the pool?</b></p> <ul style="list-style-type: none"> <li>▪ You (Go to f)</li> <li>▪ Another household member (Go to e)</li> <li>▪ An employee / contractor (Go to e)</li> </ul>                                                    | 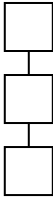      |
| <p><b>e) Are you able to answer questions about the number of times and length of time the pool is filled?</b></p> <ul style="list-style-type: none"> <li>▪ Yes (Go to f)</li> <li>▪ No (Go to CAR MODULE)</li> </ul>                                                                                  |       |
| <p><b>f) Think back over the last 7 days: did you or anyone else in the household top up the pool etc?</b></p> <ul style="list-style-type: none"> <li>▪ Yes (Go to g)</li> <li>• No (Go to Swimming pool Q2)</li> </ul>                                                                                |      |
| <p><b>g) How many times did you or someone else in the household top up the pool etc in the last 7 days?<br/>(If you answered once, Go to g, otherwise Go to h)</b></p>                                                                                                                                | <div style="border: 1px solid black; padding: 5px; width: 60px; margin: 0 auto;">#</div> |
| <p><b>h) If the pool etc was topped up only once in the last week, when was the last time before this that it was topped up?</b></p> <ul style="list-style-type: none"> <li>• Between 1-2 weeks ago</li> <li>• More than 2 weeks but less than 4 weeks ago</li> <li>• More than a month ago</li> </ul> |     |
| <p><b>i) In which ways was the pool pond etc topped up in the last 7 days?</b></p> <ul style="list-style-type: none"> <li>▪ Hose</li> <li>▪ Bucket</li> <li>▪ Other Specify.....</li> </ul>                                                                                                            |     |
| <p><b>j) When the pool etc was last topped up in the last 7 days approximately how long was the hose running or how many buckets were used (ie per session)?<br/>GO TO CAR MODULE</b></p>                                                                                                              | <div style="border: 1px solid black; padding: 5px; width: 60px; margin: 0 auto;">#</div> |

|                                                                                                                                                                                                                                                                                                                                           |                                                                                                                               |
|-------------------------------------------------------------------------------------------------------------------------------------------------------------------------------------------------------------------------------------------------------------------------------------------------------------------------------------------|-------------------------------------------------------------------------------------------------------------------------------|
| <p><b>2. If you did not top up the pool etc in the last 7 days think about the occasion before that when you topped up the pool</b></p> <p><b>a) When was this?</b></p> <ul style="list-style-type: none"> <li>• Between 1-2 weeks ago</li> <li>• More than 2 weeks but less than 4 weeks ago</li> <li>• More than a month ago</li> </ul> | <div style="text-align: center;"> <input type="checkbox"/><br/> <input type="checkbox"/><br/> <input type="checkbox"/> </div> |
| <p><b>b) In which ways was the pool pond etc topped up on this occasion?</b></p> <ul style="list-style-type: none"> <li>▪ Hose</li> <li>▪ Bucket</li> <li>▪ Other</li> </ul>                                                                                                                                                              | <div style="text-align: center;"> <input type="checkbox"/><br/> <input type="checkbox"/><br/> <input type="checkbox"/> </div> |
| <p><b>c) On this last occasion that you topped up the pool etc, approximately how long was the hose running/ how many buckets were used?</b></p> <p style="text-align: center;"><b>GO TO CARWASHING MODULE</b></p>                                                                                                                        | <div style="text-align: center;"> <input type="text" value="#"/> </div>                                                       |

| <b>CAR WASHING MODULE</b>                                                                                                                                                                                                                                                         |                                                                                          |
|-----------------------------------------------------------------------------------------------------------------------------------------------------------------------------------------------------------------------------------------------------------------------------------|------------------------------------------------------------------------------------------|
| <p><b>1. Do you wash cars at home using the outdoor water tap?</b></p> <ul style="list-style-type: none"> <li>▪ Yes (if <b>DUAL RETICULATION</b> Go to a, If <b>CONTROL</b> go to b)</li> <li>▪ No (<b>Go to PET WASHING MODULE</b>)</li> </ul>                                   | 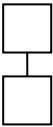      |
| <p><b>QUESTION FOR DUAL RETICULATION ONLY</b></p> <p><b>a) Which water type do you use to clean the car?</b></p> <ul style="list-style-type: none"> <li>• Recycled water only</li> <li>• Drinking water only</li> <li>• A mixture of drinking water and recycled water</li> </ul> |       |
| <p><b>b) How many cars on the property?</b></p>                                                                                                                                                                                                                                   | <div style="border: 1px solid black; padding: 5px; width: 80px; margin: 0 auto;">#</div> |
| <p><b>c) How many cars are washed at home?</b></p>                                                                                                                                                                                                                                | <div style="border: 1px solid black; padding: 5px; width: 80px; margin: 0 auto;">#</div> |
| <p><b>d) Who in the household is usually responsible for washing the car(s) at home?</b></p> <ul style="list-style-type: none"> <li>▪ You (Go to f)</li> <li>▪ Another household member (Go to e)</li> </ul>                                                                      |     |
| <p><b>e) Are you able to answer questions about car washing?</b></p> <ul style="list-style-type: none"> <li>▪ Yes (Go to f)</li> <li>▪ No (<b>Go to PET WASHING MODULE</b>)</li> </ul>                                                                                            |     |
| <p><b>f) Think back over the last 7 days: did you or anyone else in the household wash the car using water from the outdoor water tap?</b></p> <ul style="list-style-type: none"> <li>▪ Yes (Go to g)</li> <li>• No (<b>Go to CAR MODULE Q2</b>)</li> </ul>                       |     |
| <p><b>g) How many times was the car washed during this 7 day period?</b><br/>(if once, Go to h, otherwise Go to i)</p>                                                                                                                                                            | <div style="border: 1px solid black; padding: 5px; width: 80px; margin: 0 auto;">#</div> |

|                                                                                                                                                                                                                                                                                                                                               |                                                                                                                                                                                     |
|-----------------------------------------------------------------------------------------------------------------------------------------------------------------------------------------------------------------------------------------------------------------------------------------------------------------------------------------------|-------------------------------------------------------------------------------------------------------------------------------------------------------------------------------------|
| <p><b>h) If the car was washed once during the last 7 days how long ago before this was the car washed?</b></p> <ul style="list-style-type: none"> <li>▪ Between 1-2 weeks ago</li> <li>▪ More than 2 weeks but less than 4 weeks ago</li> <li>▪ More than a month ago</li> </ul>                                                             | <div style="text-align: center;"> <input type="checkbox"/><br/> <input type="checkbox"/><br/> <input type="checkbox"/> </div>                                                       |
| <p><b>i) In which ways did you or someone else in the household wash the car during the last 7 days? (<i>More than one answer allowed</i>)</b></p> <ul style="list-style-type: none"> <li>▪ Hose, no trigger nozzle</li> <li>▪ Hose with trigger nozzle</li> <li>▪ High pressure device</li> <li>▪ Bucket</li> </ul>                          | <div style="text-align: center;"> Y/N<br/><br/> <input type="checkbox"/><br/> <input type="checkbox"/><br/> <input type="checkbox"/><br/> <input type="checkbox"/> </div>           |
| <p><b>j) On this last occasion that you cleaned the car approximately how long was the hose running and / or how many buckets did you use?</b></p> <ul style="list-style-type: none"> <li>▪ Hose, no trigger nozzle</li> <li>▪ Hose with trigger nozzle</li> <li>▪ High pressure device</li> <li>▪ Bucket</li> </ul>                          | <div style="text-align: center;"> <input type="text" value="#"/><br/> <input type="text" value="#"/><br/> <input type="text" value="#"/><br/> <input type="text" value="#"/> </div> |
| <p><b>k) What is the maximum number of people present in the vicinity when you last washed the car excluding the person that washed the car?</b><br/><b>GO TO PET MODULE</b></p>                                                                                                                                                              | <div style="text-align: center;"> <input type="text" value="#"/> </div>                                                                                                             |
| <p><b>2. If you <u>did not</u> wash the car in the last 7 days think about the occasion before that when you washed the car</b></p> <p><b>a) How long ago was this?</b></p> <ul style="list-style-type: none"> <li>• Between 1-2 weeks ago</li> <li>• More than 2 weeks but less than 4 weeks ago</li> <li>• More than a month ago</li> </ul> | <div style="text-align: center;"> <input type="checkbox"/><br/> <input type="checkbox"/><br/> <input type="checkbox"/> </div>                                                       |

|                                                                                                                                                                                                                                                                                                                                  |                                                                                                                                                         |
|----------------------------------------------------------------------------------------------------------------------------------------------------------------------------------------------------------------------------------------------------------------------------------------------------------------------------------|---------------------------------------------------------------------------------------------------------------------------------------------------------|
| <p><b>b) In which of the following ways did you or someone else in the household wash the car on this occasion ? (<i>More than one answer allowed</i>)</b></p> <ul style="list-style-type: none"> <li>▪ Hose, no trigger nozzle</li> <li>▪ Hose with trigger nozzle</li> <li>▪ High pressure device</li> <li>▪ Bucket</li> </ul> | <p>Y/N</p> <p><input type="checkbox"/></p> <p><input type="checkbox"/></p> <p><input type="checkbox"/></p> <p><input type="checkbox"/></p>              |
| <p><b>c) On this last occasion that you cleaned the car approximately how long was the hose running and / or how many buckets did you use?</b></p> <ul style="list-style-type: none"> <li>▪ Hose, no trigger nozzle</li> <li>▪ Hose with trigger nozzle</li> <li>▪ High pressure device</li> <li>▪ Bucket</li> </ul>             | <p><input type="text" value="#"/></p> <p><input type="text" value="#"/></p> <p><input type="text" value="#"/></p> <p><input type="text" value="#"/></p> |
| <p><b>d) What is the maximum number of people present in the vicinity when you last washed the car excluding the person that washed the car?</b></p> <p style="text-align: center;"><b>GO TO PET MODULE</b></p>                                                                                                                  | <p><input type="text" value="#"/></p>                                                                                                                   |

| <b>PET WASHING MODULE</b>                                                                                                                                                                                                                          |                                                                                            |
|----------------------------------------------------------------------------------------------------------------------------------------------------------------------------------------------------------------------------------------------------|--------------------------------------------------------------------------------------------|
| a) How many pets do you have?                                                                                                                                                                                                                      | <input type="text" value="#"/>                                                             |
| b) Do you have pets that are washed or rinsed at home using the <u>outdoor water tap??</u> <ul style="list-style-type: none"> <li>▪ Yes (Go to c)</li> <li>▪ No (Go to <b>HARD SURFACES CLEANING MODULE</b>)</li> </ul>                            | <input type="checkbox"/><br> <br><input type="checkbox"/>                                  |
| c) How many pets are washed or rinsed at home using the outdoor water tap?                                                                                                                                                                         | <input type="text" value="#"/>                                                             |
| d) What water do you use outside to wash or rinse the pet? <ul style="list-style-type: none"> <li>• Recycled water only</li> <li>• Drinking water only</li> <li>• A mixture of recycled and drinking water</li> </ul>                              | <input type="checkbox"/><br> <br><input type="checkbox"/><br> <br><input type="checkbox"/> |
| e) Who in your household is usually responsible for washing or rinsing the pet at home? <ul style="list-style-type: none"> <li>▪ You (Go to g)</li> <li>▪ Other household member (Go to f)</li> <li>▪ Other (pet service etc) (Go to f)</li> </ul> | <input type="checkbox"/><br> <br><input type="checkbox"/><br> <br><input type="checkbox"/> |
| f) Are you able to answer questions about pet washing frequency and use of water for this purpose? <ul style="list-style-type: none"> <li>▪ Yes (Go to g)</li> <li>▪ No (Go to <b>HARD SURFACES CLEANING MODULE</b>)</li> </ul>                    | <input type="checkbox"/><br> <br><input type="checkbox"/>                                  |
| g) Think back over the last 7 days: did you or anyone else in the household wash or rinse the pets using the outdoor water tap? <ul style="list-style-type: none"> <li>▪ Yes (Go to h)</li> <li>• No (Go to hard surfaces Module Q2)</li> </ul>    | <input type="checkbox"/><br> <br><input type="checkbox"/>                                  |
| h) How many times in the last 7 days did you wash the pet?<br><br>(If once, Go to i otherwise Go to j)                                                                                                                                             | <input type="text" value="#"/>                                                             |

|                                                                                                                                                                                                                                                                                                                                                                                                             |                                                                                                                                                                                     |
|-------------------------------------------------------------------------------------------------------------------------------------------------------------------------------------------------------------------------------------------------------------------------------------------------------------------------------------------------------------------------------------------------------------|-------------------------------------------------------------------------------------------------------------------------------------------------------------------------------------|
| <p><b>i) If the pet was washed only once in the last 7 days when was the last time before that the pet was washed?</b></p> <ul style="list-style-type: none"> <li>▪ Between 1-2 weeks ago</li> <li>▪ More than 2 weeks but less than 4 weeks ago</li> <li>▪ More than a month ago</li> </ul>                                                                                                                | <div style="text-align: center;"> <input type="checkbox"/><br/> <input type="checkbox"/><br/> <input type="checkbox"/> </div>                                                       |
| <p><b>j) In which of the following ways did you or someone else in the household wash or rinse the pet in the last 7 days? (<i>More than one answer allowed</i>)</b></p> <ul style="list-style-type: none"> <li>▪ Using bucket</li> <li>▪ Using hose with trigger nozzle</li> <li>▪ Using pet cleaning service that connects to outdoor recycled water supply</li> <li>▪ Other<br/>Specify .....</li> </ul> | <div style="text-align: center;"> Y/N<br/><br/> <input type="checkbox"/><br/> <input type="checkbox"/><br/> <input type="checkbox"/><br/> <input type="checkbox"/> </div>           |
| <p><b>k) For how long was the water tap on when you washed the pet?</b></p> <ul style="list-style-type: none"> <li>▪ Using bucket</li> <li>▪ Using hose with trigger nozzle</li> <li>▪ Using pet cleaning service that connects to outdoor recycled water supply</li> <li>▪ Other</li> </ul>                                                                                                                | <div style="text-align: center;"> <input type="text" value="#"/><br/> <input type="text" value="#"/><br/> <input type="text" value="#"/><br/> <input type="text" value="#"/> </div> |
| <p><b>l) What was the maximum number of people present when you washed the pet in the last 7 days?</b></p> <p style="text-align: center;"><b>GO TO HARD SURFACES CLEANING MODULE</b></p>                                                                                                                                                                                                                    | <div style="text-align: center;"> <input type="text" value="#"/> </div>                                                                                                             |
| <p><b>2. If you <u>did not</u> wash the pet in the last 7 days think about the occasion before that when you washed the pet(s)</b></p> <p><b>a) How long ago was this?</b></p> <ul style="list-style-type: none"> <li>• Between 1-2 weeks ago</li> <li>• More than 2 weeks but less than 4 weeks ago</li> <li>• More than a month ago</li> </ul>                                                            | <div style="text-align: center;"> <input type="checkbox"/><br/> <input type="checkbox"/><br/> <input type="checkbox"/> </div>                                                       |

|                                                                                                                                                                                                                                                                                                                                                                                                           |                                                                                                                                                                                                                                                                                        |
|-----------------------------------------------------------------------------------------------------------------------------------------------------------------------------------------------------------------------------------------------------------------------------------------------------------------------------------------------------------------------------------------------------------|----------------------------------------------------------------------------------------------------------------------------------------------------------------------------------------------------------------------------------------------------------------------------------------|
| <p><b>b) In which of the following ways did you or someone else in the household wash or rinse the pet on this occasion? (<i>More than one answer allowed</i>)</b></p> <ul style="list-style-type: none"> <li>▪ Using bucket</li> <li>▪ Using hose with trigger nozzle</li> <li>▪ Using pet cleaning service that connects to outdoor recycled water supply</li> <li>▪ Other<br/>Specify .....</li> </ul> | <p style="text-align: center;">Y/N</p> <p style="text-align: center;"><input type="checkbox"/></p> <p style="text-align: center;"><input type="checkbox"/></p> <p style="text-align: center;"><input type="checkbox"/></p> <p style="text-align: center;"><input type="checkbox"/></p> |
| <p><b>c) For how long was the water tap on when you washed the pet?</b></p> <ul style="list-style-type: none"> <li>▪ Using bucket</li> <li>▪ Using hose with trigger nozzle</li> <li>▪ Using pet cleaning service that connects to outdoor recycled water supply</li> <li>▪ Other</li> </ul>                                                                                                              | <p style="text-align: center;"><input type="text" value="#"/></p>                |
| <p><b>d) What was the maximum number of people present in the vicinity when the pet was last washed excluding the person washing the pet?</b></p> <p style="text-align: center;"><b>GO TO HARD SURFACES CLEANING MODULE</b></p>                                                                                                                                                                           | <p style="text-align: center;"><input type="text" value="#"/></p>                                                                                                                                                                                                                      |



| <b>HARD SURFACES CLEANING MODULE</b>                                                                                                                                                                                                                                                                                                                    |                                                                                                                                                     |
|---------------------------------------------------------------------------------------------------------------------------------------------------------------------------------------------------------------------------------------------------------------------------------------------------------------------------------------------------------|-----------------------------------------------------------------------------------------------------------------------------------------------------|
| <p><b>1. Do you use the outdoor water tap to clean <u>outdoor</u> hard surfaces such as windows paths etc?</b></p> <ul style="list-style-type: none"> <li>▪ Yes (Go to a if dual reticulation households or go to b if control household)</li> <li>▪ No (Go to 'OTHER' MODULE)</li> </ul>                                                               | <input type="checkbox"/><br><input type="checkbox"/>                                                                                                |
| <p><b>ASK DUAL RETICULATION HOUSEHOLDS ONLY</b></p> <p><b>a) What sort of water is used to clean outdoor hard surfaces such as windows and paths etc?</b></p> <ul style="list-style-type: none"> <li>• Recycled water only</li> <li>• Drinking water only</li> <li>• A mixture of drinking water and recycled water</li> </ul>                          | <input type="checkbox"/><br><input type="checkbox"/><br><input type="checkbox"/>                                                                    |
| <p><b>b) Who is the person usually responsible for cleaning outdoor hard surfaces such as windows, paths etc?</b></p> <ul style="list-style-type: none"> <li>▪ You (Go to d)</li> <li>• Another household member (Go to c)</li> <li>▪ Contractor (Go to c)</li> </ul>                                                                                   | <input type="checkbox"/><br><input type="checkbox"/><br><input type="checkbox"/>                                                                    |
| <p><b>c) Are you able to answer questions about the washing of outdoor hard surfaces and use of water for this purpose?</b></p> <ul style="list-style-type: none"> <li>▪ Yes (Go to e)</li> <li>▪ No (Go to 'Other' module)</li> <li>▪</li> </ul>                                                                                                       | <input type="checkbox"/><br><input type="checkbox"/>                                                                                                |
| <p><b>d) Which of the following <u>outdoor</u> hard surfaces are washed down?</b></p> <ul style="list-style-type: none"> <li>▪ Paths (concrete, brick and other)</li> <li>▪ Paving surrounding swimming pools, decking, entertainment area</li> <li>▪ Brick walls and masonry</li> <li>▪ Windows</li> <li>▪ Other</li> </ul> <p><b>Specify.....</b></p> | <p>Y/N</p> <input type="checkbox"/><br><input type="checkbox"/><br><input type="checkbox"/><br><input type="checkbox"/><br><input type="checkbox"/> |

|                                                                                                                                                                                                                                                                                                                                                                                      |                                                                                                                                                                                                                                  |
|--------------------------------------------------------------------------------------------------------------------------------------------------------------------------------------------------------------------------------------------------------------------------------------------------------------------------------------------------------------------------------------|----------------------------------------------------------------------------------------------------------------------------------------------------------------------------------------------------------------------------------|
| <p>e) <b>Think back over the last 7 days: did you or anyone else in the household wash down hard surfaces outside?</b></p> <ul style="list-style-type: none"> <li>▪ Yes (Go to f)</li> <li>▪ No (Go to HARD SURFACES MODULE Q2)</li> </ul>                                                                                                                                           | <div style="text-align: center;"> <input type="checkbox"/><br/> <input type="checkbox"/> </div>                                                                                                                                  |
| <p>f) <b>How many times in the last 7 days did you wash down hard surfaces outside?</b></p> <p>(If once, Go to f otherwise Go to g)</p>                                                                                                                                                                                                                                              | <div style="text-align: center;"> <input type="text" value="#"/> </div>                                                                                                                                                          |
| <p>g) <b>If outdoor hard surfaces were washed down only once in the last 7 days when was the last time before this that they were washed down?</b></p> <ul style="list-style-type: none"> <li>▪ Between 1-2 weeks ago</li> <li>▪ More than 2 weeks but less than 4 weeks ago</li> <li>▪ More than a month ago</li> </ul>                                                             | <div style="text-align: center;"> <input type="checkbox"/><br/> <input type="checkbox"/><br/> <input type="checkbox"/> </div>                                                                                                    |
| <p>h) <b>In which of the following ways did you or someone else in the household wash down outdoor hard surfaces in the last 7 days? (More than one answer allowed)</b></p> <ul style="list-style-type: none"> <li>▪ Hose, no trigger nozzle</li> <li>▪ Hose with trigger nozzle)</li> <li>▪ High pressure device</li> <li>▪ Bucket</li> <li>▪ Other</li> </ul> <p>Specify .....</p> | <p style="text-align: center;">Y/N</p> <div style="text-align: center;"> <input type="checkbox"/><br/> <input type="checkbox"/><br/> <input type="checkbox"/><br/> <input type="checkbox"/><br/> <input type="checkbox"/> </div> |
| <p>i) <b>For how long was the water tap on (or how many buckets were used) during each session when you washed down the hard surfaces?</b></p> <ul style="list-style-type: none"> <li>▪ Hose, no trigger nozzle</li> <li>▪ Hose with trigger nozzle)</li> <li>▪ High pressure device</li> <li>▪ Bucket</li> <li>▪ Other</li> </ul>                                                   | <div style="text-align: center;"> <input type="text" value="#"/><br/> <input type="text" value="#"/><br/> <input type="text" value="#"/><br/> <input type="text" value="#"/><br/> <input type="text" value="#"/> </div>          |

|                                                                                                                                                                                                                                                                                                                                                                                        |                                                                                                                                                                                                                                                                                                                                                                                                                                                                                                                                                                                                           |
|----------------------------------------------------------------------------------------------------------------------------------------------------------------------------------------------------------------------------------------------------------------------------------------------------------------------------------------------------------------------------------------|-----------------------------------------------------------------------------------------------------------------------------------------------------------------------------------------------------------------------------------------------------------------------------------------------------------------------------------------------------------------------------------------------------------------------------------------------------------------------------------------------------------------------------------------------------------------------------------------------------------|
| <p><b>j) What was the maximum number of people present in the vicinity when the hard surfaces were washed down in the last 7 days excluding the person washing them down?<br/>GO TO 'OTHER' MODULE</b></p>                                                                                                                                                                             | <div style="border: 1px solid black; width: 40px; height: 20px; margin: 0 auto; text-align: center;">#</div>                                                                                                                                                                                                                                                                                                                                                                                                                                                                                              |
| <p><b>2. If you or someone else <u>did not</u> wash down outdoor hard surfaces in the last 7 days think about the occasion before that when you washed hard surfaces</b></p> <p><b>a) How long ago was this?</b></p> <ul style="list-style-type: none"> <li>• Between 1-2 weeks ago</li> <li>• More than 2 weeks but less than 4 weeks ago</li> <li>• More than a month ago</li> </ul> | <div style="text-align: center;"> <div style="border: 1px solid black; width: 20px; height: 20px; margin: 0 auto;"></div> <div style="text-align: center; margin: 2px;"> </div> <div style="border: 1px solid black; width: 20px; height: 20px; margin: 0 auto;"></div> <div style="text-align: center; margin: 2px;"> </div> <div style="border: 1px solid black; width: 20px; height: 20px; margin: 0 auto;"></div> </div>                                                                                                                                                                              |
| <p><b>b) In which of the following ways did you or someone else in the household last wash down outdoor hard surfaces? (<i>More than one answer allowed</i>)</b></p> <ul style="list-style-type: none"> <li>▪ Hose, no trigger nozzle</li> <li>▪ Hose with trigger nozzle)</li> <li>▪ High pressure device</li> <li>▪ Bucket</li> <li>▪ Other</li> </ul> <p>Specify .....</p>          | <p style="text-align: center;">Y/N</p> <div style="text-align: center;"> <div style="border: 1px solid black; width: 20px; height: 20px; margin: 0 auto;"></div> <div style="border: 1px solid black; width: 20px; height: 20px; margin: 0 auto;"></div> <div style="border: 1px solid black; width: 20px; height: 20px; margin: 0 auto;"></div> <div style="border: 1px solid black; width: 20px; height: 20px; margin: 0 auto;"></div> <div style="border: 1px solid black; width: 20px; height: 20px; margin: 0 auto;"></div> </div>                                                                   |
| <p><b>c) For how long was the water tap on (or how many buckets were used) during each session when the hard surfaces were washed down?</b></p> <ul style="list-style-type: none"> <li>▪ Hose, no trigger nozzle</li> <li>▪ Hose with trigger nozzle)</li> <li>▪ High pressure device</li> <li>▪ Bucket</li> <li>▪ Other</li> </ul>                                                    | <div style="text-align: center;"> <div style="border: 1px solid black; width: 20px; height: 20px; margin: 0 auto; text-align: center;">#</div> <div style="border: 1px solid black; width: 20px; height: 20px; margin: 0 auto; text-align: center;">#</div> <div style="border: 1px solid black; width: 20px; height: 20px; margin: 0 auto; text-align: center;">#</div> <div style="border: 1px solid black; width: 20px; height: 20px; margin: 0 auto; text-align: center;">#</div> <div style="border: 1px solid black; width: 20px; height: 20px; margin: 0 auto; text-align: center;">#</div> </div> |

|                                                                                                                                                                                                    |          |
|----------------------------------------------------------------------------------------------------------------------------------------------------------------------------------------------------|----------|
| <p><b>d) What was the maximum number of people present in the vicinity when outdoor hard surfaces were washed down excluding the person washing them down?</b><br/><b>GO TO 'OTHER' MODULE</b></p> | <p>#</p> |
|----------------------------------------------------------------------------------------------------------------------------------------------------------------------------------------------------|----------|

| <b>OTHER MODULE</b>                                                                                                                                                                                                                                                                             |                                                                                                                         |
|-------------------------------------------------------------------------------------------------------------------------------------------------------------------------------------------------------------------------------------------------------------------------------------------------|-------------------------------------------------------------------------------------------------------------------------|
| <p><b>1. Do you use outdoor water taps to supply water for any purposes other than garden watering, car washing, hard surface cleaning, pet washing, such as water play?</b></p> <ul style="list-style-type: none"> <li>▪ No (Go to Question 3 this module)</li> <li>▪ Yes (Go to a)</li> </ul> | <input type="checkbox"/><br><input type="checkbox"/>                                                                    |
| <p><b>a) Specify the activity</b></p> <p>.....</p>                                                                                                                                                                                                                                              |                                                                                                                         |
| <p><b>ASK DUAL RETICULATION HOUSEHOLDS ONLY</b></p> <p><b>b) What type of outdoor water do you use?</b></p> <ul style="list-style-type: none"> <li>• Recycled water only</li> <li>• Drinking water only</li> <li>• A mixture of recycled water and drinking water</li> </ul>                    | <input type="checkbox"/><br><input type="checkbox"/><br><input type="checkbox"/>                                        |
| <p><b>c) Who in the household conducts this activity?</b></p> <ul style="list-style-type: none"> <li>▪ You (Go to e)</li> <li>▪ Other household member (Go to d)</li> </ul>                                                                                                                     | <input type="checkbox"/><br><input type="checkbox"/>                                                                    |
| <p><b>d) How often is this activity conducted?</b></p> <ul style="list-style-type: none"> <li>• Weekly or more frequently</li> <li>• Every 2-4 weeks</li> <li>• Less frequently than monthly</li> </ul>                                                                                         | <input type="checkbox"/><br><input type="checkbox"/><br><input type="checkbox"/>                                        |
| <p><b>e) What method is used when conducting this activity? (<i>More than one answer allowed</i>)</b></p> <ul style="list-style-type: none"> <li>▪ Hose, no trigger nozzle</li> <li>▪ Hose with trigger nozzle</li> <li>▪ High pressure device</li> <li>▪ Bucket</li> </ul>                     | <p>Y/N</p> <input type="checkbox"/><br><input type="checkbox"/><br><input type="checkbox"/><br><input type="checkbox"/> |

|                                                                                                                                                                                                                                                                                                                              |                                                                                                                                                                                     |
|------------------------------------------------------------------------------------------------------------------------------------------------------------------------------------------------------------------------------------------------------------------------------------------------------------------------------|-------------------------------------------------------------------------------------------------------------------------------------------------------------------------------------|
| <p><b>f) On this last occasion that you performed this activity approximately how long was the hose running and / or how many buckets did you use?</b></p> <ul style="list-style-type: none"> <li>▪ Hose, no trigger nozzle</li> <li>▪ Hose with trigger nozzle</li> <li>▪ High pressure device</li> <li>▪ Bucket</li> </ul> | <div style="text-align: center;"> <input type="text" value="#"/><br/> <input type="text" value="#"/><br/> <input type="text" value="#"/><br/> <input type="text" value="#"/> </div> |
| <p><b>Q3 How often do members of the family visit local parks?</b></p> <ul style="list-style-type: none"> <li>• More than once per week</li> <li>• Weekly (once per week)</li> <li>• Every 2-4 weeks</li> <li>• Less frequently than monthly</li> </ul>                                                                      | <div style="text-align: center;"> <input type="checkbox"/><br/> <input type="checkbox"/><br/> <input type="checkbox"/><br/> <input type="checkbox"/> </div>                         |

| <b>LAUNDRY MODULE</b>                                                                                                                                                                                                                                 |                                                                                                  |
|-------------------------------------------------------------------------------------------------------------------------------------------------------------------------------------------------------------------------------------------------------|--------------------------------------------------------------------------------------------------|
| <p><b>1. Who in your household usually does the laundry tasks?</b></p> <ul style="list-style-type: none"> <li>▪ You (Go to question 3)</li> <li>▪ Other householder (Go to 2)</li> <li>▪ Other (ie no laundry facilities etc) (Go to 2)</li> </ul>    | 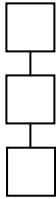              |
| <p><b>2. Are you able to answer questions about laundry washing and the use of water for this purpose</b></p> <ul style="list-style-type: none"> <li>▪ Yes (Go to Question 3, this section)</li> <li>▪ No (Go to Question 8, this section)</li> </ul> |               |
| <p><b>3. What proportion of your laundry is done using a machine?</b></p> <ul style="list-style-type: none"> <li>▪ All or almost all</li> <li>▪ About ¾</li> <li>▪ About ½</li> <li>▪ About ¼</li> <li>▪ Almost none/ None</li> </ul>                 |              |
| <p><b>4. Type of washing machine?</b></p> <ul style="list-style-type: none"> <li>▪ Top loader</li> <li>▪ Front loader</li> </ul>                                                                                                                      |             |
| <p><b>5. Water level usually selected?</b></p> <ul style="list-style-type: none"> <li>▪ High</li> <li>▪ Medium</li> <li>▪ Low</li> <li>▪ Automatic selection</li> </ul>                                                                               | <p>Y/N</p>  |
| <p><b>6. Number of loads per week?</b></p>                                                                                                                                                                                                            | <div style="border: 1px solid black; padding: 5px; display: inline-block;">#</div>               |

|                                                                                                                                                                                                                                                                                                                                       |                                                                                                                                                                            |
|---------------------------------------------------------------------------------------------------------------------------------------------------------------------------------------------------------------------------------------------------------------------------------------------------------------------------------------|----------------------------------------------------------------------------------------------------------------------------------------------------------------------------|
| <p><b>7. Water temperature usually selected</b></p> <ul style="list-style-type: none"> <li>▪ Hot only</li> <li>▪ Cold only</li> <li>▪ Warm</li> </ul>                                                                                                                                                                                 | <p>Y/N</p> <p><input type="checkbox"/></p> <p><input type="checkbox"/></p> <p><input type="checkbox"/></p>                                                                 |
| <p><b>8. Are there any rainwater tanks on the property?</b></p> <ul style="list-style-type: none"> <li>▪ Yes (<b>Go to Question 9, this section</b>)</li> <li>▪ No (<b>Go to Question 10, this section</b>)</li> </ul>                                                                                                                | <p><input type="checkbox"/></p> <p><input type="checkbox"/></p>                                                                                                            |
| <p><b>9. What is the rainwater used for?</b></p> <ul style="list-style-type: none"> <li>▪ Drinking</li> <li>▪ Lawn and garden watering</li> <li>▪ Vegetable garden watering</li> <li>▪ Toilet flushing</li> <li>▪ Other .....(specify)</li> </ul> <p>STOP HERE FOR RECYCLED WATER HOUSEHOLDS,<br/>CONTINUE FOR CONTROL HOUSEHOLDS</p> | <p>Y/N</p> <p><input type="checkbox"/></p> <p><input type="checkbox"/></p> <p><input type="checkbox"/></p> <p><input type="checkbox"/></p> <p><input type="checkbox"/></p> |
| <p><b>10. Do you have a grey water or stormwater system</b></p> <ul style="list-style-type: none"> <li>• Yes (<b>Go to QUESTION 11</b>)</li> <li>• No (<b>FINISH</b>)</li> </ul>                                                                                                                                                      | <p><input type="checkbox"/></p> <p><input type="checkbox"/></p>                                                                                                            |
| <p><b>11. What is the grey water or stormwater used for?</b></p> <ul style="list-style-type: none"> <li>▪ Lawn and garden watering</li> <li>▪ Vegetable garden watering</li> <li>▪ Toilet flushing</li> <li>Other (specify).....</li> </ul>                                                                                           | <p>Y/N</p> <p><input type="checkbox"/></p> <p><input type="checkbox"/></p> <p><input type="checkbox"/></p> <p><input type="checkbox"/></p>                                 |

**End of the interview**



This is the end of the interview but I would like to explore whether you are willing to complete a water activity diary for a one week period in the coming month.

**If No response,**

Thank householder for their time in assisting with the telephone interview and ask if there are any questions

**If Yes response:**

Confirm the residential address to which diary cards should be sent  
Agree on week in the coming month that the diary will be completed

Advise householder of \$40 department voucher for return of a **satisfactorily completed** diary. Emphasise that ***all*** water usage must be recorded for the week and that **all** boxes must be filled in. If there is no water usage for the week for a particular purpose eg outdoor purposes other than garden watering or garden watering then instruct householder to indicate this by placing a diagonal line on the card.
